# Supplementary material for: Structural Equation Modeling of In silico Perturbations
Source: PubMed Central journal article supplement (PMC8652139; doi:10.3389/fgene.2021.727532), 2021-11-24
Supplement: DataSheet1.pdf [file DataSheet1.pdf]

# Structural Equation Modeling of In silico Perturbations

Jianying Li<sup>1,2,3†</sup>, Pierre R. Bushel<sup>3,4†</sup>, Lin Lin<sup>5,6</sup>, Kevin Day<sup>7</sup>, Tianyuan Wang<sup>1,2</sup>, Francesco J. DeMayo<sup>6</sup>, San-Pin Wu<sup>6\*</sup>, and Jian-Liang Li<sup>1\*</sup>

<sup>1</sup> Integrative Bioinformatics, Epigenetics and Stem Cell Biology Laboratory, Division of Intramural Research, National Institute of Environmental Health Sciences, Research Triangle Park, NC 27709, USA

<sup>2</sup> Kelly Government Solutions, Research Triangle Park, NC 27709, USA

<sup>3</sup> Massive Genome Informatics Group, National Institute of Environmental Health Sciences, Research Triangle Park, NC 27709, USA

<sup>4</sup> Biostatistics and Computational Biology Branch, Division of Intramural Research, National Institute of Environmental Health Sciences, Research Triangle Park, NC 27709, USA

<sup>5</sup> Department of Family Health Care Nursing, University of California at San Francisco, San Francisco, CA 94143, USA

<sup>6</sup> Reproductive and Developmental Biology Laboratory, National Institute of Environmental Health Sciences, Research Triangle Park, NC 27709, USA

<sup>7</sup> Duke University, Durham NC 27708

†These authors have contributed equally to this work and share first authorship

**\* Correspondence:**

Jian-Liang Li ([jianliang.li@nih.gov](mailto:jianliang.li@nih.gov)) and San-Pin Wu ([steve.wu@nih.gov](mailto:steve.wu@nih.gov))

Running Title: Structural Equation Modeling In silico

**Keywords: Structural Equation Modeling, gene expression, *in silico* perturbation, molecular interaction, R, Shiny**

## Supplemental Methods

### Two-class bootstrap simulation

The primary objective of selecting SEM in our research and fundamental advantage of SEM is to allow researchers to derive the relationship between variables of interest when these variables are not directly measurable. In the proposed SEMIPs method, we tested the relationship via a 3-node SEM model among three variables in a complex genomic system. Each of these variables can either be a regulator that regulates a group of downstream genes or a readout of impact from some upstream regulator. The a two-sided t-statistic, namely T-scores are calculated based on the direction of these upstream/downstream signatures(genes), and then used in the SEM modeling.

When we have a group of signatures (genes) obtained from an experiment (i.e. a KEGG pathway analysis in our paper, data comes with the SEMIPs application at “/app\_installation\_dir /testData/bootstrap/”), we are interested in finding out whether a regulator (upstream/downstream) is associated with a factor (i.e. GATA2 in our example) in our SEM model. We chose to eliminate these group of signatures (genes) from the GATA2-related signatures. To provide an unbiased assessment of such analysis, we implemented a two-class bootstrap simulation method “elimination with replacement and elimination without replacement” (Figure 3).

In an elimination without replacement bootstrap analysis, it randomly eliminated the same number of signatures from this originate GATA2-related signatures, then re-calculate the T-score

and re-evaluate the SEM model. In the paper, we suggest a 1,000 round of simulation to provide an empirical distribution for any non-parametric statistics test. On the other hand, in the elimination with replacement bootstrap analysis, after randomly eliminating the same number of signatures from this originate GATA2-related signatures, we replace the same number of “irrelevant” signatures back to the “shrunkened” list. Then, we re-calculate the T-score and re-evaluate the SEM model, we also suggest a 1000 round of simulation to provide an empirical distribution for any non-parametric statistics test.

The elimination without replacement simulation was used to test whether a regulator has any impact on our factor (i.e. GATA2) in term of function association; and the elimination with replacement simulation was used to rule out the possibility that the number of downstream signatures of a factor (i.e. GATA2) has any impact on its function. Both empirical distributions serve as the null hypothesis for the statistical testing.

### **Gene list preparation**

The microarray gene expression data was analyzed using The Partek Genomics Suite 7.17 software (Partek Inc., St. Louis, MO). The Robust Multichip Analysis (RMA) algorithm with quantile for normalization and log<sub>2</sub> transformation was applied to generate gene expression values of all samples. The one-way analysis of variance (ANOVA) model was used to compare expression profiles from different groups. Differentially expressed genes (DEGs) were identified using the filters of ANOVA unadjusted p value < 0.01 and absolute fold change > 1.3.

The published GATA2 occupancy information GEO accession: GSE40659 (Rubel et al. 2016) was first lifted from mm9 to mm10 genome assembly and then annotated by HOMER (Heinz et al. 2010) for the nearby genes. The obtained GATA2 ChIP-seq targets were mapped to the GATA2 signature from microarray data to identify the putative GATA2 direct downstream targets (GATA2 direct signature - Supplemental Table 1). The criteria used to selected GATA2 ChIP-seq targets was GATA2 binding at immediate promoter regions ( $\pm$ 2kb of TSS).

### **The main steps to follow the use case example**

**Step 1. To get the T-score:** Users can launch the App and import the 634 genes list (Supplemental Table 1) and HumanArray4Shiny comes with the App. By clicking the green “Go” button, the corresponding T score will then be calculated and can be download (shown in Supplemental Figure 1). We also provided this calculated T-score in Supplemental Table 2.

**Step 2. To construct the dataset:** Users need to open the `_sampleDAT.txt` under the “`app_installation_dir/dataSEM/`”, i.e. `/Users/li11/myGit/SEMIPs/dataSEM`, append the new T - Score column from step 1 and name the header accordingly. We use “GATA2 Direct” in this use case. Please save the new file as “`app_installation_dir/dataSEM/sampleDAT.txt`”.

**Step 3. To run the SEM model:** Users need to re-launch the app. Under the SEM tab, from the drop-down list select “GATA2 Direct”, “PGR\_act\_FC13\_P01”, and “SOX17\_lev” as show in Supplemental Figure 2. Then the structural equation model will be fitted accordingly. User can

download the 3-node SEM image as well as the model fitting details as shown in Supplemental Figure 2.

The screenshot shows the SEMIPs web application interface. On the left, there are two upload sections: 'Upload the signature file' with a file named 'SupplementalTableP.xlsx' and 'Upload the human microarray file' with a file named 'HumanArray4Shiny.xlsx'. Below these are sections for 'Gene Type' (Mouse selected) and 'Comment[GENE\_SYMBOL] | Probe'. The main area on the right displays a table of T-scores for various variables, with a search bar and a 'Download T-Scores' button. The table has columns for Variable, p-value, and T-score.

| Variable   | p-value      | T-score    |
|------------|--------------|------------|
| GSM1402321 | 0.01051669   | -2.56731   |
| GSM1402322 | 0.0941931    | 1.676627   |
| GSM1402323 | 0.001499051  | 3.191199   |
| GSM1402324 | 0.001669822  | 3.159306   |
| GSM1402325 | 0.01038546   | 2.571715   |
| GSM1402326 | 0.3942981    | 0.8525284  |
| GSM1402327 | 0.08548575   | 1.722857   |
| GSM1402328 | 1.443728e-16 | -8.532726  |
| GSM1402329 | 0.003450122  | -2.937461  |
| GSM1402330 | 0.4622874    | -0.7356092 |

Supplementary Figure 1. An illustration for using the App to calculate T-score for Supplemental Table 1.

**Upload the signature file**

Browse... Human Sig.xlsx

Upload complete

**Gene Type**

Mouse

Human

| Human | Signature |
|-------|-----------|
| ?     | High      |
| LRP2  | High      |
| ACTA1 | High      |
| LRP2  | High      |

**Upload the human microarray file**

Browse... HumanArray4Shiny.xlsx

Upload complete

| Comment[GENE_SYMBOL] | Probe   |
|----------------------|---------|
| ATP5G2               | Probe-1 |
| C7orf40              | Probe-2 |
| OR9Q2                | Probe-4 |
| C2CD4A               | Probe-5 |
| AC063977.1           | Probe-6 |

Tabs: T Scores SEM Bootstrap Instructions

Model SEM Intro

**Choose a exogenous variable**

GATA2\_act\_FC13\_PC

**Choose a exogenous variable**

PRG\_act\_FC13\_P01

**Choose a endogenous variable**

SOX17\_lev

[Download Results](#)

lavaan 0.6-9 ended normally after 13 iterations

|                            |        |
|----------------------------|--------|
| Estimator                  | ML     |
| Optimization method        | NLMINB |
| Number of model parameters | 3      |
| Number of observations     | 115    |

Model Test User Model:

|                    |       |
|--------------------|-------|
| Test statistic     | 0.000 |
| Degrees of freedom | 0     |

Model Test Baseline Model:

|                    |        |
|--------------------|--------|
| Test statistic     | 54.722 |
| Degrees of freedom | 2      |
| P-value            | 0.000  |

User Model versus Baseline Model:

|                             |       |
|-----------------------------|-------|
| Comparative Fit Index (CFI) | 1.000 |
| Tucker-Lewis Index (TLI)    | 1.000 |

Loglikelihood and Information Criteria:

|                                       |         |
|---------------------------------------|---------|
| Loglikelihood user model (H0)         | -93.315 |
| Loglikelihood unrestricted model (H1) | -93.315 |
| Akaike (AIC)                          | 192.631 |
| Bayesian (BIC)                        | 200.865 |
| Sample-size adjusted Bayesian (BIC)   | 191.383 |

Root Mean Square Error of Approximation:

**Supplementary Figure 2.** An illustration for using the App to fit the structural equation model for Supplemental Table 2 (GATA2 direct gene list). The fitting statistics can be downloaded by clicking the “Download Results” button.

## References

Heinz, S., et al. (2010). "Simple combinations of lineage-determining transcription factors prime cis-regulatory elements required for macrophage and B cell identities." *Mol Cell* **38**(4): 576-589.

Rubel, C. A., et al. (2016). "A Gata2-Dependent Transcription Network Regulates Uterine Progesterone Responsiveness and Endometrial Function." *Cell Rep* **17**(5): 1414-1425.
